# Supplementary material
Source: PubMed Central journal article supplement (PMC3723355)
Supplement: NIHMS484231-supplement-1.pdf [file NIHMS484231-supplement-1.pdf]

## **Supplementary Data**

Supplementary Figure 1. Characterization of MMTV-PPAR $\delta$  transgenic mice.

Supplementary Figure 2. Metabolomic analysis

Supplementary Figure 3. Signaling pathways associated with PPRE-containing genes. activated in MMTV-PPAR $\delta$  mice treated with GW501516 for 11 weeks.

Supplementary Table 1. Antibodies for IHC and western blotting.

Supplementary Table 2. List of primers for qRT-PCR analysis.

Supplementary Table 3. Gene expression preferentially altered in MMTV-PPAR $\delta$  mice treated with GW501516 and everolimus.

Supplementary Table 4. Gene expression preferentially altered in MMTV-PPAR $\delta$  mice treated with GW501516 for 11 weeks.

Supplementary Table 5. Gene expression preferentially altered in MMTV-PPAR $\delta$  mice.

Supplementary Table 6. Gene expression preferentially altered in wild-type mice treated with GW501516 for 11 weeks.

**Supplementary Figure 1. Characterization of MMTV-PPAR $\delta$  transgenic mice.** **A**, MMTV-PPAR $\delta$  construct. **B**, Founder lines identified by PCR of tail genomic DNA. **C**, Western analysis of mammary gland lysates from 5-week-old mice of founder M-23, showing higher PPAR $\delta$  expression in transgenic (+) vs. wild-type (-) mice. **D**, IHC detection of PPAR $\delta$  in the mammary gland of 5-week-old wild-type (WT) and transgenic (PPAR $\delta$ ) mice. Magnification, 400X. **E**, Whole mounts of wild-type (WT) and transgenic (PPAR $\delta$ ) mice fed a GW501516 diet (GW) for 1 to 11 weeks. Note the extensive nodules only in PPAR $\delta$  mice fed the GW501516 diet (PPAR $\delta$ +GW). Magnification, 10X. **F**, IHC detection of Ki-67 in mammary tissue of 11-week old WT and PPAR $\delta$  mice fed the GW diet for 6 weeks. Only PPAR $\delta$  mice fed the GW diet expressed Ki-67. Magnification, 200X.

**Supplementary Figure 2.** **A**, LC-MS profiles of [+] ions from mammary tissue of control and GW501516-treated wild-type (WT) and PPAR $\delta$  mice. The inset indicates the phosphatidylcholine (PC) profile of the [+] ions in the chromatogram. **B**, total ion chromatogram (TIC) of [-] ions corrected for retention time. As a visualization of the quality control of this correction procedure, an overlay of TIC's from each sample is shown. **C**, TIC of [+] ions corrected for retention time.

**Supplementary Figure 3. Signaling pathways associated with PPRE-containing genes activated in MMTV-PPAR $\delta$  mice treated with GW501516 for 11 weeks.** **A**, Signaling pathways determined by Pathway Studio 9.0 based on the gene expression profile in Supplementary Table 4. **B** and **C** are enlargements of the boxed areas in **A**.

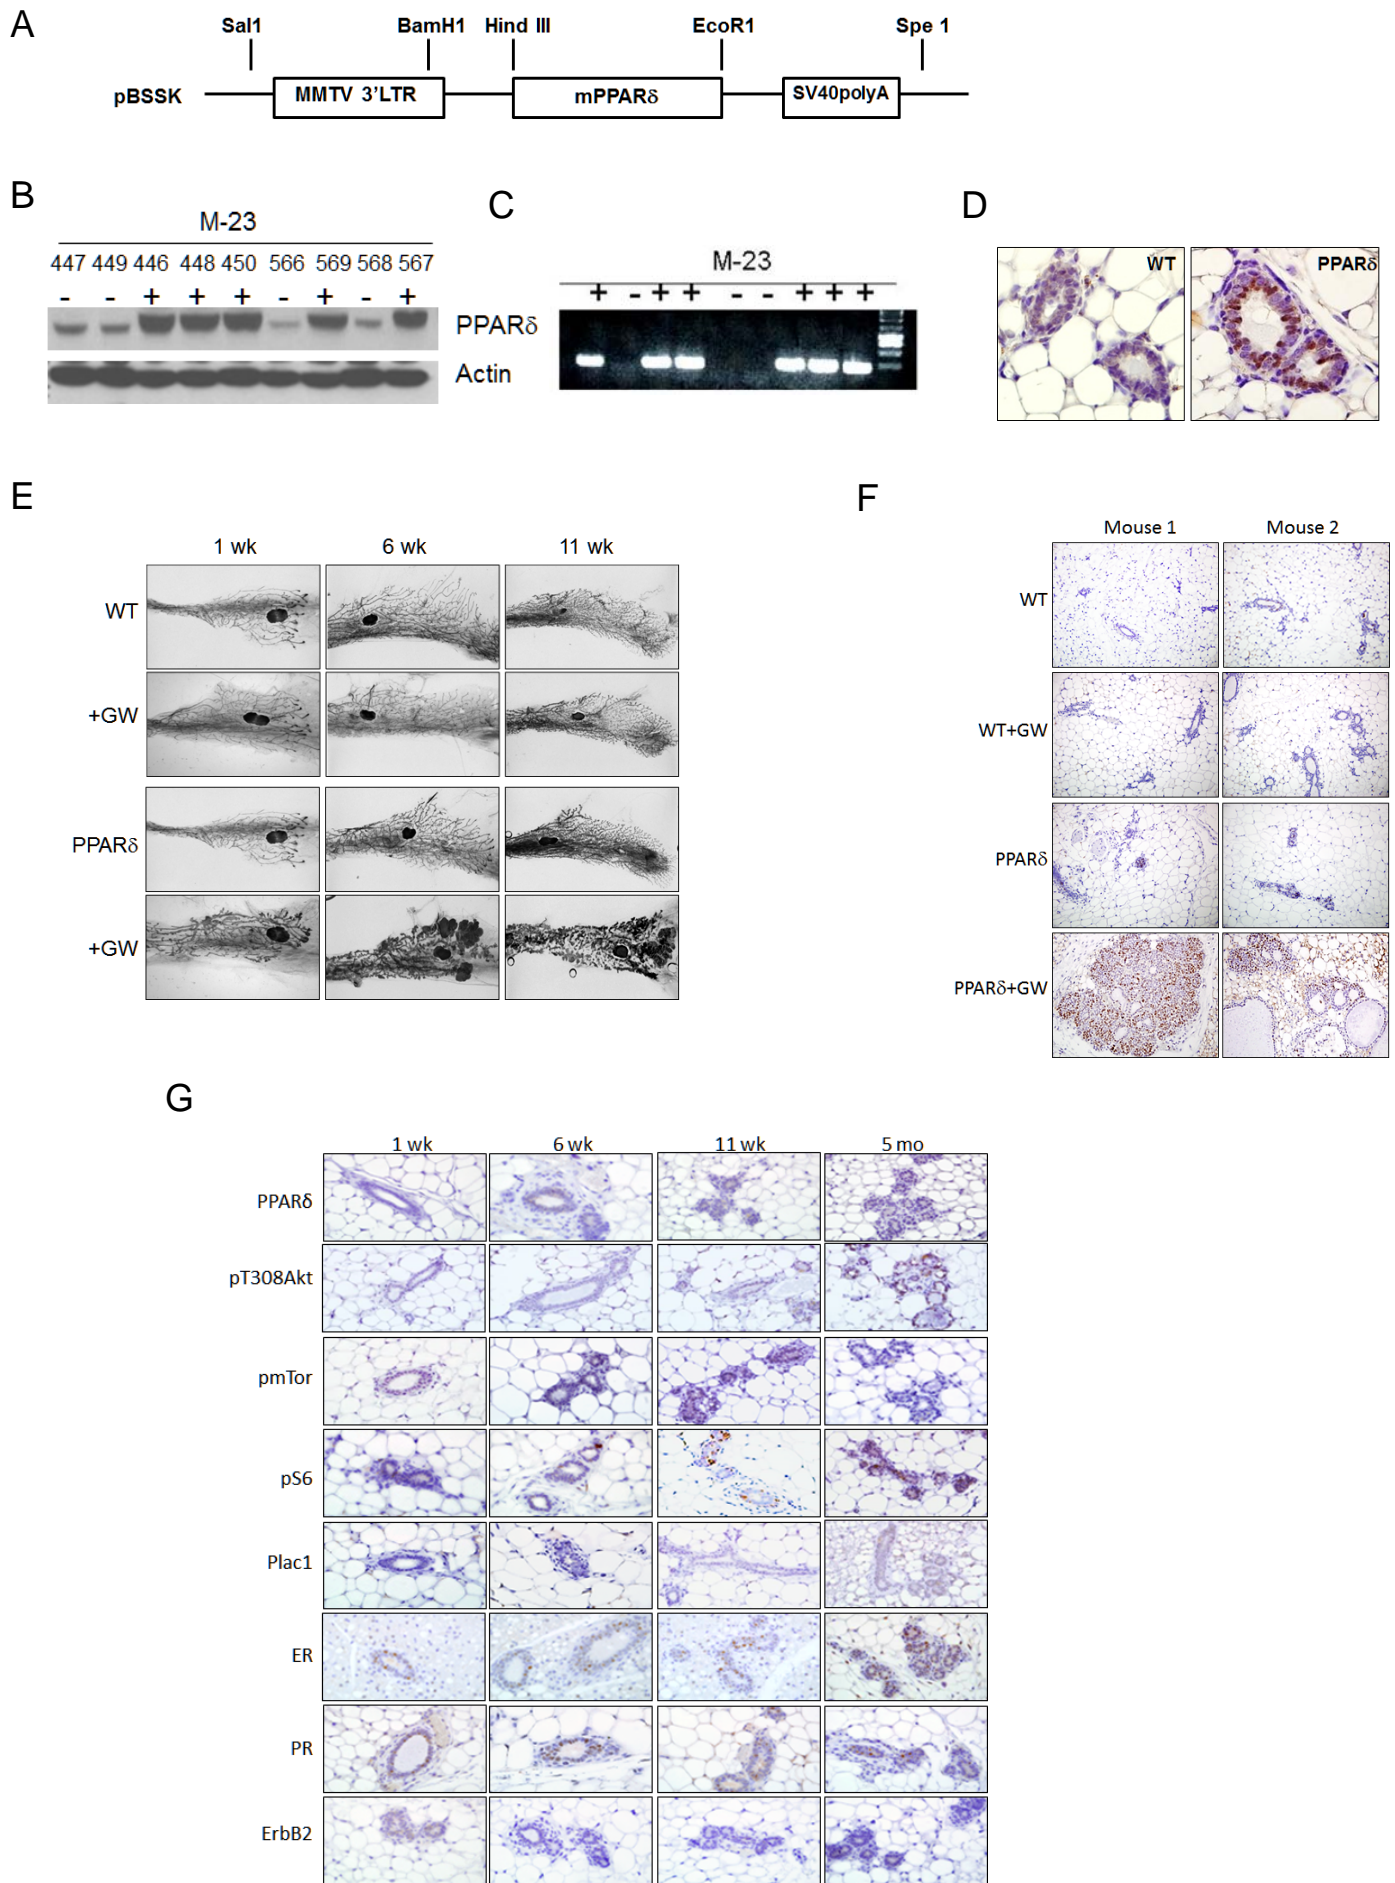

Supplementary Figure 1

A

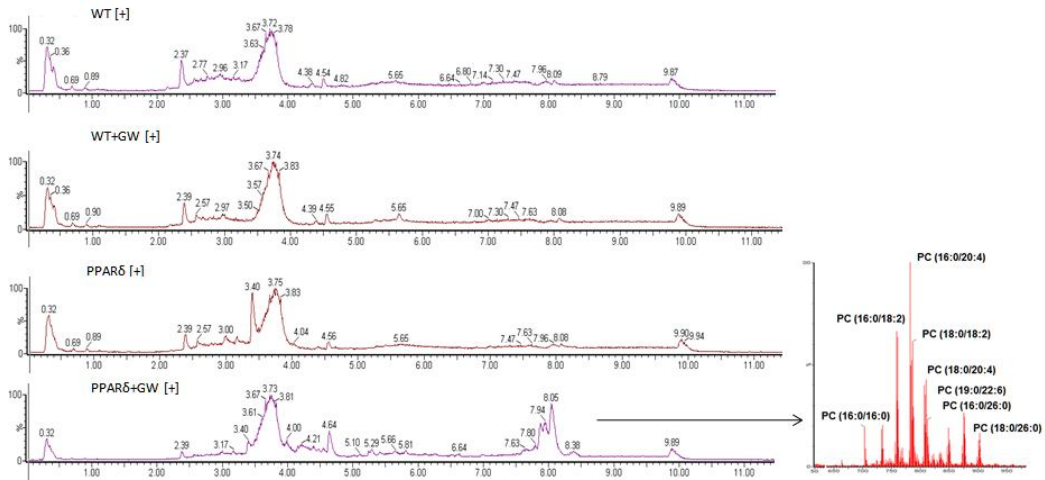

B

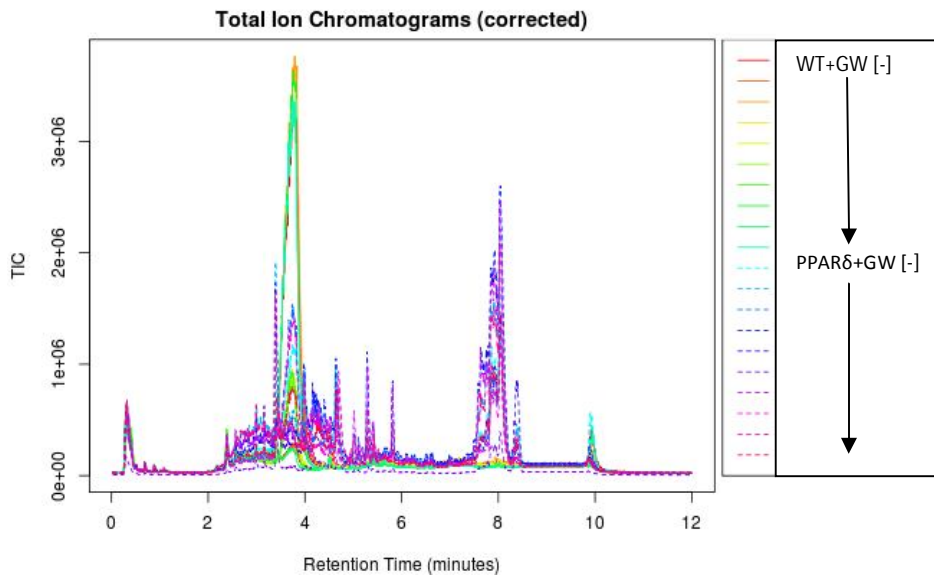

C

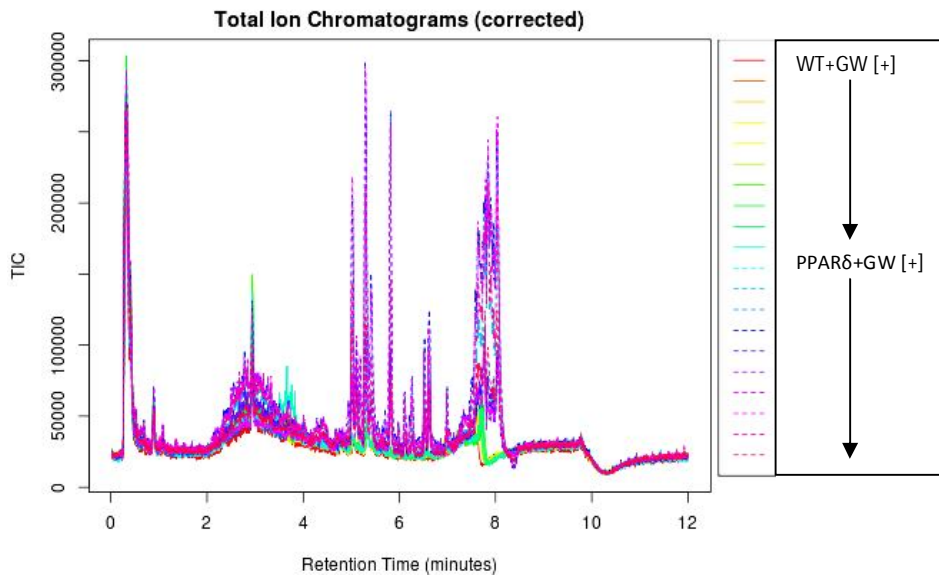

Supplementary Figure 2



A

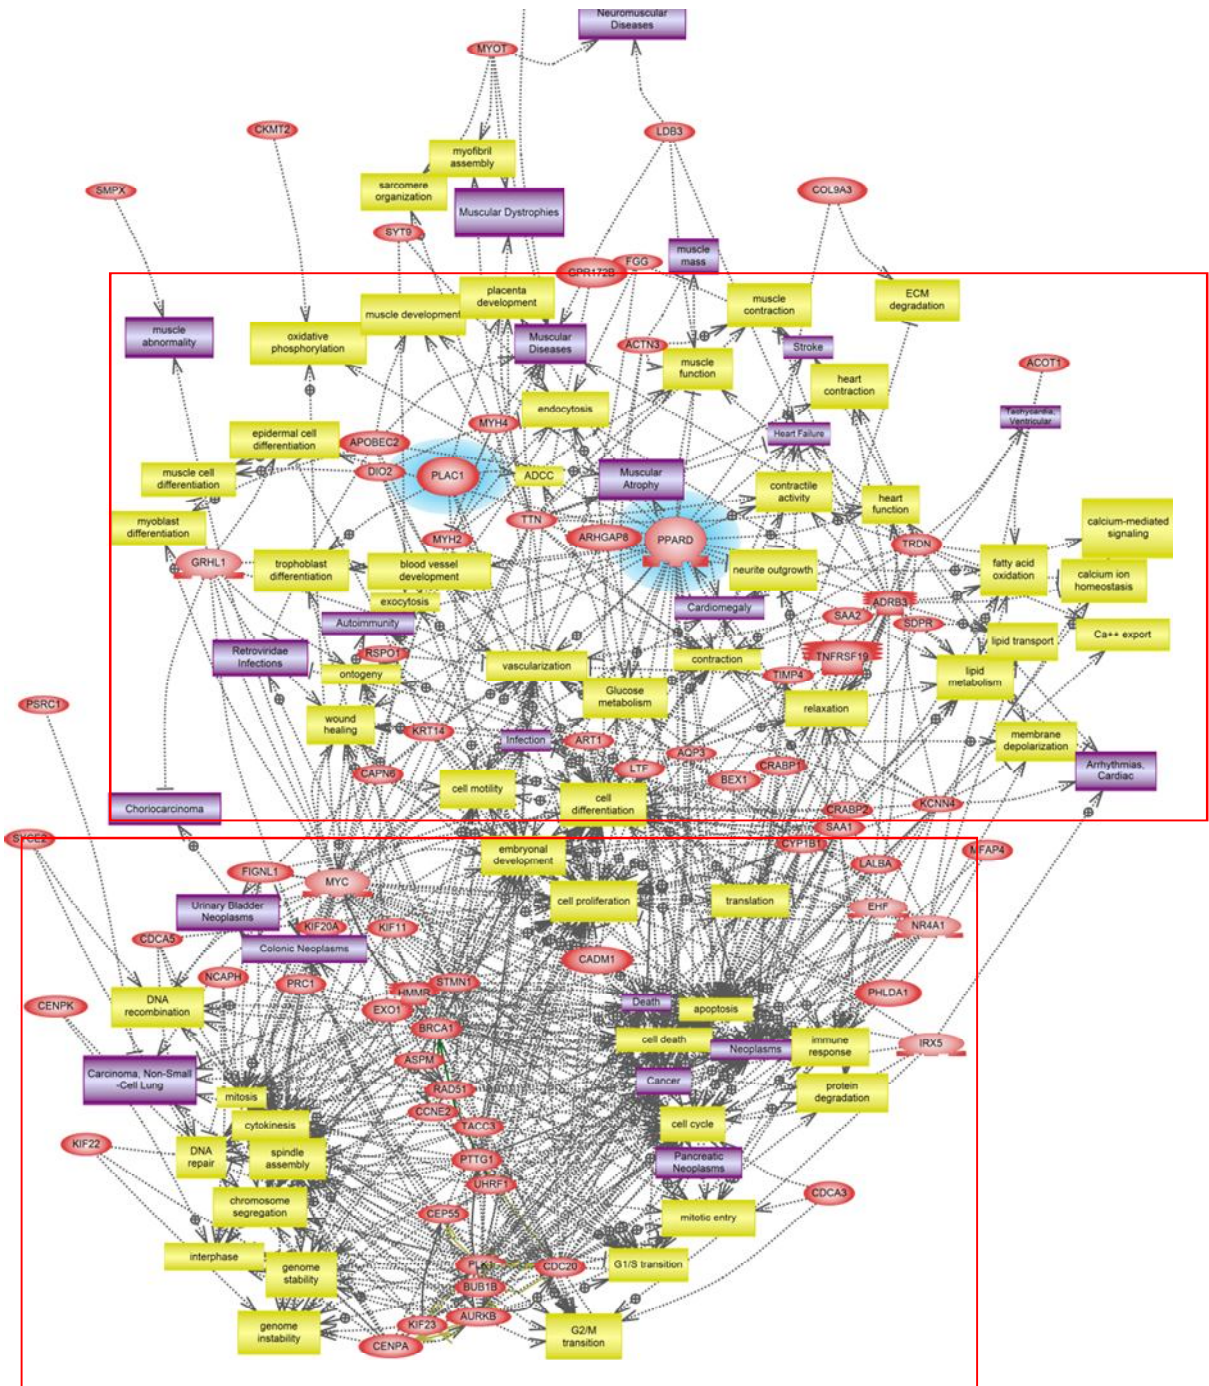

Supplementary Figure 3A



B

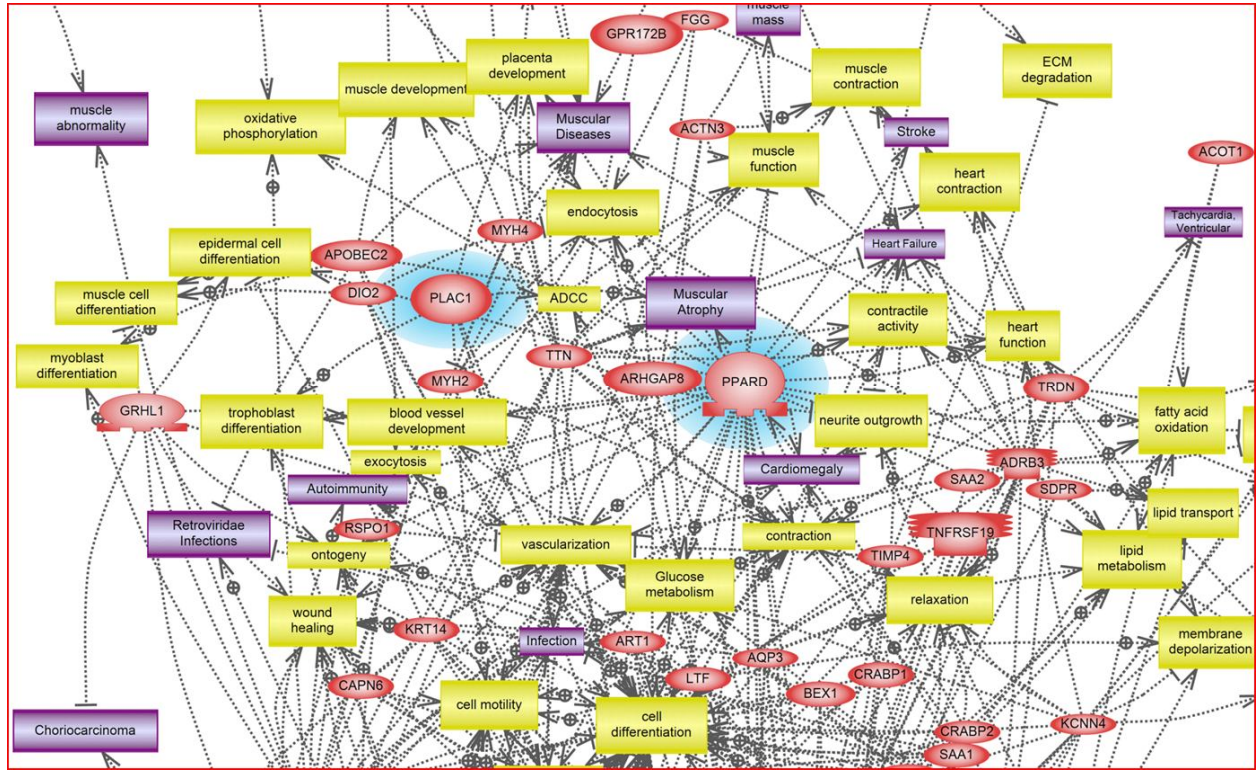

C

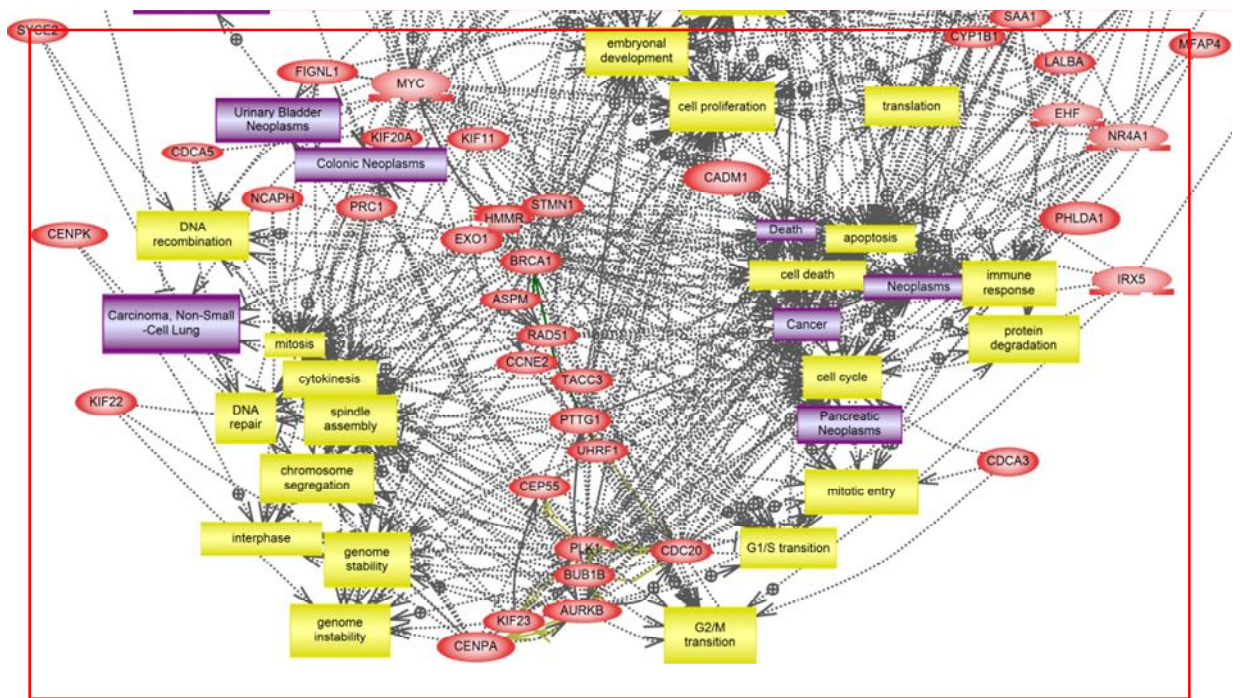

Supplementary Figure 3B,C

**Supplementary Table 1. Antibodies for IHC and western blotting.**

| Antibody                                | Catalog # | Source                                    | Dilution |       |
|-----------------------------------------|-----------|-------------------------------------------|----------|-------|
|                                         |           |                                           | IHC      | WB    |
| Rabbit anti-pSer79AcetylCoA Carboxylase | 3661      | Cell Signaling                            |          |       |
| Rabbit anti-pThr308AKT                  | sc-16646  | Santa Cruz                                | 600      | 1,000 |
| Sheep anti-pSer473AKT                   | 06-801    | Upstate                                   | 100      | 1,000 |
| Rabbit anti-AKT                         | 4685      | Cell Signaling                            |          | 1,000 |
| Mouse anti-PDK1                         | sc-17765  | Santa Cruz                                | 50       | 1,000 |
| Goat anti-PPAR $\delta$ (K-20)          | sc-7197   | Santa Cruz                                | 200      | 500   |
| Rabbit anti-pThr37/46-4EBP              | 2855      | Cell Signaling                            | 60       | 2,000 |
| Rabbit anti-4EBP                        | 9644      | Cell Signaling                            |          | 1,000 |
| Rabbit anti-pSer2448mTOR                | 2976      | Cell Signaling                            | 50       | 1,000 |
| Rabbit anti-mTOR                        | 2983      | Cell Signaling                            |          | 1,000 |
| Rabbit anti-p44/42-ERK1/2               | 4376      | Cell Signaling                            | 100      | 1,000 |
| Rabbit anti-ERK                         | 6182      | Cell Signaling                            |          | 1,000 |
| Rabbit anti-pSer235/236S6               | 4857      | Cell Signaling                            | 200      | 1,000 |
| Rabbit anti-S6                          | 2317      | Cell Signaling                            |          | 1,000 |
| Rabbit anti-Plac1                       |           | Michael Fant, University of South Florida | 400      | 1,000 |
| Mouse anti-Actin                        | A5441     | Sigma                                     |          | 5,000 |

**Supplementary Table 2. List of primers for q-RT-PCR analysis**

| Gene    | Forward Primer (5'→3') | Reverse Primer (5'→3') |
|---------|------------------------|------------------------|
| Saa2    | ACACCAGCAGGATGAAGCTA   | GCCAGCTTCCTTCATGTCA    |
| Klk6    | GGCTTCCTGTGATAGGTGGT   | CTCCGACCAGGCTGATTTAG   |
| Klk11   | TAGGGAAGTAAGGCGAAGGA   | CAGGTTCCCTGGTTTCTGTAG  |
| Olah    | AAGACTGGCTGGGAGAGAAA   | TGTAGGATCCGAAACTGTGG   |
| Acsl4   | CAGCACCTTCGACTCAGATC   | TTGGAGAAGGCAATAATGGA   |
| Slc28a3 | GAAATGGGTGGTCTGGAGTT   | ATGAGTCCGCCAAAGGATAC   |
| Scnn1g  | CCCAGCCAACAGTATTGAGA   | GGCGGGCAATAATAGAGAAG   |
| mPlac1  | AAGATTGAAGGCTAAGGGACC  | CTCCTTTGAAACGTGGCTTTG  |
| Esr1    | TGATCAACTGGGCAAAGA     | CAGGAGCAGGTCATAGAG     |
| mPPARd  | ACGGTAAAGGCAGTCCATCT   | GTGGCTGTTCCATGACTGAC   |



**Supplementary Table 3. Gene expression preferentially altered in MMTV-PPAR $\delta$  mice treated with GW501516 and everolimus.** MMTV-PPAR $\delta$  mice ( $\delta$ ) were fed a diet containing 0.005% GW501516 (GW) for 6 weeks, and administered either vehicle or 10 mg/kg everolimus (RAD) by gavage once daily during weeks 4 through 6. Shown are  $\geq 3$ -fold changes in gene expression in mammary tissue with a raw score  $\geq 300$ . Symbols in **bold** denote genes containing PPAR response elements.

| Function                                                             | Gene Symbol    | Raw Score    |                  | Ratio                          |
|----------------------------------------------------------------------|----------------|--------------|------------------|--------------------------------|
|                                                                      |                | $\delta$ +GW | $\delta$ +GW+RAD | $\delta$ +GW+RAD/ $\delta$ +GW |
| <b>Adhesion/Extracellular Matrix</b>                                 |                |              |                  |                                |
| contactin 1                                                          | <b>Cntn1</b>   | 101          | 323              | 3.2                            |
| proline arginine-rich end leucine-rich repeat                        | <b>Prelp</b>   | 654          | 1811             | 2.8                            |
| cadherin-related family member 1                                     | Cdhr1          | 424          | 148              | 0.3                            |
| <b>Differentiation/Development</b>                                   |                |              |                  |                                |
| keratin 77                                                           | <b>Krt77</b>   | 4            | 354              | 88.3                           |
| loricrin                                                             | Lor            | 13           | 588              | 46.5                           |
| keratinocyte differentiation associated protein                      | <b>Krtdap</b>  | 55           | 594              | 10.9                           |
| keratin 10                                                           | <b>Krt10</b>   | 313          | 2962             | 9.5                            |
| neuronatin                                                           | <b>Nnat</b>    | 803          | 3246             | 4.0                            |
| keratin 15                                                           | <b>Krt15</b>   | 151          | 527              | 3.5                            |
| mesoderm specific transcript                                         | <b>Mest</b>    | 174          | 518              | 3.0                            |
| keratin 79                                                           | <b>Krt79</b>   | 810          | 264              | 0.33                           |
| lactotransferrin                                                     | <b>Ltf</b>     | 4356         | 1116             | 0.26                           |
| parvalbumin                                                          | <b>Pvalb</b>   | 2059         | 436              | 0.21                           |
| casein alpha s2-like B                                               | Csn1s2b        | 851          | 160              | 0.19                           |
| <b>Inflammation/Immune Response</b>                                  |                |              |                  |                                |
| killer cell lectin-like receptor subfamily A, member 20              | Klra20         | 90           | 356              | 3.9                            |
| monocyte to macrophage differentiation-associated 2                  | Mmd2           | 170          | 523              | 3.1                            |
| interleukin 1 receptor-like 1                                        | Il1rl1         | 112          | 315              | 2.8                            |
| immunoglobulin heavy chain 2 (serum IgA)                             | Igh-2          | 6338         | 1914             | 0.30                           |
| polymeric immunoglobulin receptor                                    | Pigr           | 621          | 148              | 0.24                           |
| serum amyloid A 3                                                    | Saa3           | 1553         | 376              | 0.24                           |
| immunoglobulin lambda chain, variable 1                              | Igl-V1         | 311          | 63               | 0.20                           |
| serum amyloid A 1                                                    | <b>Saa1</b>    | 11018        | 1306             | 0.12                           |
| serum amyloid A 2                                                    | <b>Saa2</b>    | 6073         | 516              | 0.08                           |
| <b>Invasion</b>                                                      |                |              |                  |                                |
| kallikrein related-peptidase 7 (chymotryptic, stratum corneum)       | <b>Klk7</b>    | 1031         | 224              | 0.22                           |
| kallikrein related-peptidase 10                                      | <b>Klk10</b>   | 841          | 177              | 0.21                           |
| kallikrein related-peptidase 6                                       | <b>Klk6</b>    | 1835         | 194              | 0.11                           |
| cystatin E/M                                                         | <b>Cst6</b>    | 7735         | 841              | 0.11                           |
| <b>Metabolism</b>                                                    |                |              |                  |                                |
| arginase type II                                                     | Arg2           | 114          | 425              | 3.7                            |
| vanin 1                                                              | <b>Vnn1</b>    | 231          | 679              | 2.9                            |
| protein phosphatase 1, regulatory (inhibitor) subunit 3A             | <b>Ppp1r3a</b> | 114          | 36               | 0.32                           |
| enolase 3, beta muscle                                               | <b>Eno3</b>    | 2129         | 576              | 0.27                           |
| cytochrome c oxidase, subunit VI a, polypeptide 2                    | <b>Cox6a2</b>  | 657          | 140              | 0.21                           |
| apolipoprotein B mRNA editing enzyme, catalytic polypeptide 2        | <b>Apobec2</b> | 477          | 91               | 0.19                           |
| phosphoglycerate mutase 2                                            | <b>Pgam2</b>   | 1106         | 176              | 0.16                           |
| carbonic anhydrase 6                                                 | Car6           | 1095         | 122              | 0.11                           |
| creatine kinase, mitochondrial 2                                     | <b>Ckmt2</b>   | 482          | 55               | 0.11                           |
| <b>Motility</b>                                                      |                |              |                  |                                |
| tropomyosin 1, alpha                                                 | <b>Tpm1</b>    | 2141         | 704              | 0.33                           |
| tropomyosin 2, beta                                                  | <b>Tpm2</b>    | 554          | 183              | 0.33                           |
| actin, alpha 1, skeletal muscle                                      | <b>Acta1</b>   | 7867         | 2551             | 0.32                           |
| actinin alpha 3                                                      | <b>Actn3</b>   | 828          | 265              | 0.32                           |
| myosin, heavy polypeptide 4, skeletal muscle                         | <b>Myh4</b>    | 3911         | 1252             | 0.32                           |
| myozenin 1                                                           | <b>Myoz1</b>   | 940          | 299              | 0.32                           |
| cardiomyopathy associated 5                                          | Cmya5          | 408          | 127              | 0.31                           |
| myosin, light polypeptide 1                                          | Myl1           | 5294         | 1573             | 0.30                           |
| calsequestrin 1                                                      | <b>Casq1</b>   | 504          | 152              | 0.30                           |
| prosaposin-like 1                                                    | Psapl1         | 801          | 217              | 0.27                           |
| titin-cap                                                            | <b>Tcap</b>    | 474          | 130              | 0.27                           |
| creatine kinase, muscle                                              | <b>Ckm</b>     | 3124         | 836              | 0.27                           |
| troponin C2, fast                                                    | <b>Tnnc2</b>   | 6563         | 1621             | 0.25                           |
| ATPase, Ca <sup>++</sup> transporting, cardiac muscle, fast twitch 1 | Atp2a1         | 1096         | 275              | 0.25                           |
| LIM domain binding 3                                                 | <b>Ldb3</b>    | 372          | 85               | 0.23                           |
| myotilin                                                             | <b>Myot</b>    | 470          | 106              | 0.23                           |
| myoglobin                                                            | Mb             | 462          | 102              | 0.22                           |
| myosin, heavy polypeptide 1, skeletal muscle, adult                  | <b>Myh1</b>    | 1450         | 322              | 0.22                           |
| troponin I, skeletal, fast 2                                         | <b>Tnni2</b>   | 3361         | 739              | 0.22                           |
| titin                                                                | <b>Ttn</b>     | 552          | 121              | 0.22                           |
| myosin light chain, phosphorylatable, fast skeletal muscle           | <b>Mylpf</b>   | 5660         | 1233             | 0.22                           |
| troponin T3, skeletal, fast                                          | <b>Tnnt3</b>   | 2231         | 478              | 0.21                           |
| small muscle protein, X-linked                                       | <b>Smpx</b>    | 436          | 72               | 0.16                           |

|                                                                   |               |      |      |      |
|-------------------------------------------------------------------|---------------|------|------|------|
| <b>Proliferation</b>                                              |               |      |      |      |
| calmodulin 4                                                      | <b>Calm4</b>  | 8    | 566  | 70.5 |
| amphiregulin                                                      | Areg          | 350  | 1937 | 5.5  |
| v-myc myelocytomatosis viral oncogene homolog 1, lung carcinoma d | <b>Mycl1</b>  | 87   | 347  | 4.0  |
| synuclein, gamma                                                  | <b>Sncg</b>   | 1644 | 4939 | 3.0  |
| FK506 binding protein 5                                           | Fkbp5         | 663  | 1898 | 2.9  |
| placental specific protein 1                                      | <b>Plac1</b>  | 1098 | 723  | 0.66 |
| myeloid leukemia factor 1                                         | Mlf1          | 344  | 117  | 0.34 |
| <b>Receptors</b>                                                  |               |      |      |      |
| peroxisome proliferator activator receptor delta                  | <b>Ppard</b>  | 1736 | 1368 | 0.79 |
| <b>Transport</b>                                                  |               |      |      |      |
| secretogranin III                                                 | Scg3          | 124  | 854  | 6.9  |
| natriuretic peptide receptor 3                                    | <b>Npr3</b>   | 296  | 1300 | 4.4  |
| <b>Transcription</b>                                              |               |      |      |      |
| zinc finger and BTB domain containing 16                          | <b>Zbtb16</b> | 495  | 2114 | 4.3  |
| forkhead box I1                                                   | <b>Foxi1</b>  | 196  | 577  | 2.9  |

**Supplementary Table 4. Gene expression preferentially altered in MMTV-PPAR $\delta$  mice treated with GW501516 for 11 weeks.**

Four week old mice were fed a diet containing 0.005% GW501516 for 11 weeks. Shown are  $\geq 3$ -fold changes in gene expression in mammary tissue with a raw score  $\geq 300$  in GW501516-treated MMTV-PPAR $\delta$  mice ( $\delta$ +GW) vs. GW501516-treated wild-type littermates (WT+GW). Symbols in **bold** denote genes with PPAR response elements.

| Gene Name                                                          | Gene Symbol    | WT   | WT+GW | PPAR $\delta$ | PPAR $\delta$ +GW | $\delta$ +GW/WT+GW |
|--------------------------------------------------------------------|----------------|------|-------|---------------|-------------------|--------------------|
| <b>Adhesion</b>                                                    |                |      |       |               |                   |                    |
| cell adhesion molecule 1                                           | <b>Cadm1</b>   | 391  | 501   | 1175          | 1267              | 2.5                |
| <b>Differentiation</b>                                             |                |      |       |               |                   |                    |
| casein alpha s2-like B                                             | Csn1s2b        | 58   | 67    | 95            | 676               | 10.1               |
| annexin A8                                                         | <b>Anxa8</b>   | 339  | 246   | 548           | 1094              | 4.4                |
| keratin 14                                                         | <b>Krt14</b>   | 683  | 1329  | 5433          | 5323              | 4.0                |
| <b>Inflammation/Immune Response</b>                                |                |      |       |               |                   |                    |
| cathelicidin antimicrobial peptide                                 | Camp           | 40   | 21    | 23            | 420               | 19.7               |
| serum amyloid A 3                                                  | <b>Saa3</b>    | 79   | 156   | 178           | 2838              | 18.2               |
| S100 calcium binding protein A9 (calgranulin B)                    | <b>S100a9</b>  | 272  | 118   | 183           | 1657              | 14.0               |
| serum amyloid A 2                                                  | <b>Saa2</b>    | 1626 | 980   | 409           | 12963             | 13.2               |
| S100 calcium binding protein A8 (calgranulin A)                    | <b>S100a8</b>  | 431  | 342   | 415           | 4266              | 12.5               |
| interleukin 1 family, member 9                                     | <b>Il1f9</b>   | 58   | 61    | 56            | 629               | 10.2               |
| serum amyloid A 1                                                  | <b>Saa1</b>    | 2715 | 1742  | 730           | 14810             | 8.5                |
| interleukin 1 receptor antagonist                                  | Il1rn          | 84   | 48    | 135           | 330               | 6.8                |
| interleukin 1 beta                                                 | <b>Il1b</b>    | 99   | 55    | 224           | 341               | 6.3                |
| chemokine (C-C motif) ligand 8                                     | <b>Ccl8</b>    | 1977 | 1777  | 2068          | 7690              | 4.3                |
| prostaglandin-endoperoxide synthase 2                              | <b>Ptgs2</b>   | 69   | 89    | 83            | 349               | 3.9                |
| Fc fragment of IgG binding protein                                 | Fcgbp          | 2493 | 1067  | 353           | 110               | 0.1                |
| <b>Invasion</b>                                                    |                |      |       |               |                   |                    |
| kallikrein related-peptidase 6                                     | <b>Klk6</b>    | 142  | 106   | 101           | 18338             | 173.1              |
| kallikrein related-peptidase 7 (chymotryptic, stratum corneum)     | <b>Klk7</b>    | 109  | 116   | 90            | 5357              | 46.1               |
| matrix metalloproteinase 13                                        | Mmp13          | 10   | 7     | 5             | 319               | 45.1               |
| kallikrein related-peptidase 10                                    | Klk10          | 9    | 32    | 78            | 938               | 29.2               |
| matrix metalloproteinase 12                                        | <b>Mmp12</b>   | 157  | 157   | 332           | 2668              | 17.0               |
| kallikrein related-peptidase 11                                    | <b>Klk11</b>   | 36   | 70    | 164           | 722               | 10.3               |
| cystatin E/M                                                       | <b>Cst6</b>    | 53   | 633   | 120           | 3899              | 6.2                |
| <b>Metabolism</b>                                                  |                |      |       |               |                   |                    |
| oleoyl-ACP hydrolase                                               | Olah           | 21   | 227   | 237           | 1361              | 6.0                |
| acyl-CoA synthetase long-chain family member 4                     | <b>Acs14</b>   | 230  | 336   | 372           | 1287              | 3.8                |
| phospholysine phosphohistidine inorganic pyrophosphate phosphatase | Lhpp           | 177  | 157   | 532           | 527               | 3.3                |
| cellular retinoic acid binding protein I                           | <b>Crabp1</b>  | 225  | 421   | 924           | 1077              | 2.6                |
| <b>Proliferation</b>                                               |                |      |       |               |                   |                    |
| placental specific protein 1                                       | <b>Plac1</b>   | 31   | 41    | 2731          | 4491              | 108.9              |
| reprimin 1, TP53 dependent G2 arrest mediator candidate            | Rprm           | 9    | 34    | 896           | 140               | 4.1                |
| cyclin B1                                                          | <b>Ccnb1</b>   | 132  | 187   | 919           | 536               | 2.9                |
| cyclin B2                                                          | Ccnb2          | 205  | 309   | 1459          | 798               | 2.6                |
| <b>Transport</b>                                                   |                |      |       |               |                   |                    |
| aquaporin 3                                                        | <b>Aqp3</b>    | 61   | 127   | 1990          | 6002              | 47.3               |
| G protein-coupled receptor 172B                                    | <b>Gpr172b</b> | 320  | 510   | 1380          | 1482              | 2.9                |
| solute carrier family 34 (sodium phosphate), member 2              | <b>Slc34a2</b> | 240  | 494   | 966           | 1407              | 2.8                |

**Supplementary Table 5. Gene expression preferentially altered in MMTV-PPAR $\delta$  mice.** Shown are  $\geq 3$ -fold changes in gene expression in mammary tissue with a raw score  $\geq 300$  in MMTV-PPAR $\delta$  mice ( $\delta$ ) vs. wild-type littermates (*WT*) at 15 weeks of age. Symbols in **bold** denote genes containing PPAR response elements.

| Function                                                                                  | Symbol          | Raw Score |          | Ratio        |
|-------------------------------------------------------------------------------------------|-----------------|-----------|----------|--------------|
|                                                                                           |                 | WT        | $\delta$ | $\delta$ /WT |
| <b>Adhesion/Extracellular Matrix</b>                                                      |                 |           |          |              |
| tight junction protein 3                                                                  | Tjp3            | 365       | 1626     | <b>4.5</b>   |
| EMI domain containing 1                                                                   | Emid1           | 394       | 1708     | <b>4.3</b>   |
| microfibrillar-associated protein 4                                                       | <b>Mfap4</b>    | 97        | 350      | <b>3.6</b>   |
| desmocollin 2                                                                             | Dsc2            | 94        | 324      | <b>3.4</b>   |
| collagen, type IX, alpha 3                                                                | <b>Col9a3</b>   | 139       | 450      | <b>3.2</b>   |
| cell adhesion molecule 1                                                                  | <b>Cadm1</b>    | 391       | 1175     | <b>3.0</b>   |
| cartilage acidic protein 1                                                                | <b>Crtac1</b>   | 511       | 147      | <b>0.29</b>  |
| fibrinogen gamma chain                                                                    | <b>Fgg</b>      | 907       | 181      | <b>0.20</b>  |
| carcinoembryonic antigen-related cell adhesion molecule 10                                | Ceacam10        | 927       | 115      | <b>0.12</b>  |
| fibrinogen beta chain                                                                     | Fgb             | 497       | 58       | <b>0.12</b>  |
| <b>Apoptosis</b>                                                                          |                 |           |          |              |
| BCL2/adenovirus E1B 19kD interacting protein like                                         | Bnip1           | 63        | 305      | <b>4.9</b>   |
| pleckstrin homology-like domain, family A, member 1                                       | <b>Phlda1</b>   | 2352      | 8397     | <b>3.6</b>   |
| Iroquois related homeobox 5 (Drosophila)                                                  | <b>Irx5</b>     | 648       | 2258     | <b>3.5</b>   |
| Iroquois related homeobox 3 (Drosophila)                                                  | <b>Irx3</b>     | 1447      | 4624     | <b>3.2</b>   |
| <b>Differentiation/Development</b>                                                        |                 |           |          |              |
| keratin 14                                                                                | <b>Krt14</b>    | 683       | 5433     | <b>8.0</b>   |
| casein alpha s2-like A                                                                    | Csn1s2a         | 255       | 1019     | <b>4.0</b>   |
| keratin 23                                                                                | Krt23           | 131       | 504      | <b>3.8</b>   |
| grainyhead-like 1 (Drosophila)                                                            | <b>Grhl1</b>    | 593       | 2275     | <b>3.8</b>   |
| hairy/enhancer-of-split related with YRPW motif 1                                         | Hey1            | 1114      | 346      | <b>0.31</b>  |
| lactotransferrin                                                                          | <b>Ltf</b>      | 6590      | 901      | <b>0.14</b>  |
| lactalbumin, alpha                                                                        | <b>Lalba</b>    | 2426      | 322      | <b>0.13</b>  |
| <b>DNA Repair</b>                                                                         |                 |           |          |              |
| RAD51 homolog ( <i>S. cerevisiae</i> )                                                    | <b>Rad51</b>    | 88        | 459      | <b>5.2</b>   |
| excision repair cross-complementing rodent repair deficiency complementation group 6-like | Erc6            | 72        | 307      | <b>4.3</b>   |
| DNA-damage-inducible transcript 4-like                                                    | Ddit4l          | 137       | 495      | <b>3.6</b>   |
| breast cancer 1                                                                           | <b>Brca1</b>    | 68        | 331      | <b>4.9</b>   |
| fidgetin-like 1                                                                           | <b>Fignl1</b>   | 176       | 770      | <b>4.4</b>   |
| exonuclease 1                                                                             | <b>Exo1</b>     | 46        | 335      | <b>7.2</b>   |
| ubiquitin-like, containing PHD and RING finger domains, 1                                 | <b>Uhrf1</b>    | 246       | 985      | <b>4.0</b>   |
| synaptonemal complex central element protein 2                                            | <b>Syce2</b>    | 306       | 1202     | <b>3.9</b>   |
| denticleless homolog (Drosophila)                                                         | Dtl             | 130       | 501      | <b>3.8</b>   |
| ADP-ribosyltransferase 1                                                                  | <b>Art1</b>     | 90        | 308      | <b>3.4</b>   |
| high mobility group box 2                                                                 | Hmgb2           | 946       | 3081     | <b>3.3</b>   |
| <b>Inflammation/Immune Response</b>                                                       |                 |           |          |              |
| peptidylprolyl isomerase (cyclophilin) like 5                                             | Ppil5           | 43        | 438      | <b>10.3</b>  |
| tumor necrosis factor receptor superfamily, member 19                                     | <b>Tnfrsf19</b> | 43        | 400      | <b>9.4</b>   |
| ectodysplasin-A receptor                                                                  | Edar            | 32        | 303      | <b>9.4</b>   |
| WAP four-disulfide core domain 12                                                         | Wfdc12          | 131       | 703      | <b>5.4</b>   |
| serum amyloid A 1                                                                         | <b>Saa1</b>     | 3209      | 861      | <b>0.27</b>  |
| immunoglobulin heavy chain 6 (heavy chain of IgM)                                         | Igh-6           | 3888      | 1022     | <b>0.26</b>  |
| serum amyloid A 2                                                                         | <b>Saa2</b>     | 1626      | 409      | <b>0.25</b>  |
| immunoglobulin kappa chain variable 28 (V28)                                              | Igk-V28         | 527       | 81       | <b>0.15</b>  |
| Fc fragment of IgG binding protein                                                        | Fcgbp           | 2493      | 353      | <b>0.14</b>  |
| immunoglobulin heavy constant gamma 1 (G1m marker)                                        | Ighg1           | 3663      | 484      | <b>0.13</b>  |
| <b>Invasion</b>                                                                           |                 |           |          |              |
| calpain 6                                                                                 | <b>Capn6</b>    | 32        | 331      | <b>10.3</b>  |
| Rho GTPase activating protein 8                                                           | <b>Arhgap8</b>  | 224       | 876      | <b>3.9</b>   |
| tissue inhibitor of metalloproteinase 4                                                   | <b>Timp4</b>    | 4348      | 1253     | <b>0.29</b>  |
| <b>Ion Channel</b>                                                                        |                 |           |          |              |
| potassium channel tetramerisation domain containing 14                                    | Kctd14          | 49        | 595      | <b>12.1</b>  |
| potassium intermediate/small conductance calcium-activated channel, subfamily N, member 4 | <b>Kcnn4</b>    | 1230      | 5036     | <b>4.1</b>   |
| potassium channel, subfamily K, member 1                                                  | Kcnk1           | 1044      | 3241     | <b>3.1</b>   |
| <b>Metabolism</b>                                                                         |                 |           |          |              |
| calcitonin/calcitonin-related polypeptide, alpha                                          | Calca           | 35        | 5293     | <b>153.1</b> |
| acyl-CoA thioesterase 1                                                                   | <b>Acot1</b>    | 1321      | 7933     | <b>6.0</b>   |
| cellular retinoic acid binding protein II                                                 | <b>Crabp2</b>   | 255       | 1115     | <b>4.4</b>   |
| creatine kinase, mitochondrial 2                                                          | <b>Ckmt2</b>    | 197       | 836      | <b>4.3</b>   |
| deiodinase, iodothyronine, type II                                                        | <b>Dio2</b>     | 79        | 321      | <b>4.1</b>   |
| ELOVL family member 7, elongation of long chain fatty acids (yeast)                       | Elov7           | 285       | 1056     | <b>3.7</b>   |
| cellular retinoic acid binding protein I                                                  | <b>Crabp1</b>   | 195       | 734      | <b>3.8</b>   |
| carbonic anhydrase 2                                                                      | <b>Car2</b>     | 1145      | 4116     | <b>3.6</b>   |
| inositol (myo)-1(or 4)-monophosphatase 2                                                  | Impa2           | 118       | 418      | <b>3.5</b>   |
| phosphoglycerate mutase 2                                                                 | <b>Pgam2</b>    | 592       | 1912     | <b>3.2</b>   |
| apolipoprotein B mRNA editing enzyme, catalytic polypeptide 2                             | <b>Apobec2</b>  | 398       | 1221     | <b>3.1</b>   |
| cytochrome P450, family 1, subfamily b, polypeptide 1                                     | <b>Cyp1b1</b>   | 1564      | 4711     | <b>3.0</b>   |
| phospholysine phosphohistidine inorganic pyrophosphate phosphatase                        | Lhpp            | 177       | 532      | <b>3.0</b>   |
| cholecystokinin                                                                           | Cck             | 1372      | 403      | <b>0.29</b>  |





|                                                       |                |      |      |             |
|-------------------------------------------------------|----------------|------|------|-------------|
| <b>Protein Folding</b>                                |                |      |      |             |
| ankyrin repeat and SOCs box-containing 5              | Asb5           | 128  | 457  | <b>3.6</b>  |
| <b>Receptors</b>                                      |                |      |      |             |
| peroxisome proliferator activator receptor delta      | <b>Ppard</b>   | 0    | 2586 | <b>NA</b>   |
| nuclear receptor subfamily 4, group A, member 1       | <b>Nr4a1</b>   | 428  | 2506 | <b>5.9</b>  |
| glutamate receptor, ionotropic, delta 1               | <b>Grid1</b>   | 32   | 155  | <b>4.9</b>  |
| thyroid hormone receptor interactor 13                | Trip13         | 184  | 686  | <b>3.7</b>  |
| adrenergic receptor, beta 3                           | <b>Adrb3</b>   | 516  | 173  | <b>0.33</b> |
| <b>RNA Splicing</b>                                   |                |      |      |             |
| epithelial splicing regulatory protein 2              | Esrp2          | 172  | 612  | <b>3.6</b>  |
| <b>Transport</b>                                      |                |      |      |             |
| aquaporin 3                                           | <b>Aqp3</b>    | 87   | 2386 | <b>27.3</b> |
| ATPase, H+ transporting, lysosomal V1 subunit C2      | Atp6v1c2       | 164  | 2984 | <b>18.2</b> |
| synaptotagmin IX                                      | <b>Syt9</b>    | 42   | 565  | <b>13.6</b> |
| major urinary protein 1 (Slc25A19)                    | Mup1           | 1025 | 4316 | <b>4.2</b>  |
| G protein-coupled receptor 172B                       | <b>Gpr172b</b> | 382  | 1599 | <b>4.2</b>  |
| solute carrier family 34 (sodium phosphate), member 2 | Slc34a2        | 240  | 966  | <b>4.0</b>  |
| major urinary protein 5                               | Mup5           | 289  | 1118 | <b>3.9</b>  |
| <b>Transcription</b>                                  |                |      |      |             |
| E2F transcription factor 8                            | E2f8           | 62   | 468  | <b>7.6</b>  |
| helicase, lymphoid specific                           | Hells          | 266  | 1276 | <b>4.8</b>  |
| ets homologous factor                                 | <b>Ehf</b>     | 656  | 2576 | <b>3.9</b>  |
| transcription factor AP-2, alpha                      | <b>Tcfap2a</b> | 162  | 509  | <b>3.1</b>  |
| myelocytomatosis oncogene                             | <b>Myc</b>     | 923  | 2727 | <b>3.0</b>  |

**Mitosis**

spindle and kinetochore associated complex subunit 1  
budding uninhibited by benzimidazoles 1 homolog (S. cerevisiae)  
centromere protein F  
maternal embryonic leucine zipper kinase  
kinesin family member 11  
kinesin family member 2C  
ect2 oncogene  
cyclin B1  
asp (abnormal spindle)-like, microcephaly associated (Drosophila)  
non-SMC condensin I complex, subunit G  
budding uninhibited by benzimidazoles 1 homolog, beta (S. cerevisiae)  
shugoshin-like 1 (S. pombe)  
kinesin family member 20A  
centromere protein E  
aurora kinase B  
proline/serine-rich coiled-coil 1  
protein regulator of cytokinesis 1  
polo-like kinase 1 (Drosophila)  
centrosomal protein 55  
kinesin family member C1  
SPC25, NDC80 kinetochore complex component, homolog (S. cerevisiae)  
kinesin family member 22  
Zwilch, kinetochore associated, homolog (Drosophila)  
calmodulin-like 3  
kinesin family member 23  
non-SMC condensin I complex, subunit H  
transforming, acidic coiled-coil containing protein 3  
aurora kinase A  
centromere protein A  
centromere protein K  
inner centromere protein  
stathmin 1  
centromere protein N  
pituitary tumor-transforming gene 1  
coiled-coil domain containing 99

**Motility**

myosin, light chain 10, regulatory  
hyaluronan mediated motility receptor (RHAMM)  
titin  
small muscle protein, X-linked  
myomesin 2  
myosin VC  
myotilin  
myosin, heavy polypeptide 4, skeletal muscle  
myosin, heavy polypeptide 2, skeletal muscle, adult  
actinin alpha 3  
triadin  
myoglobin  
LIM domain binding 3

**Proliferation**

reprimin, TP53 dependent G2 arrest mediator candidate  
placental specific protein 1  
R-spondin homolog (Xenopus laevis)  
Shc SH2-domain binding protein 1  
syntaxin 19  
antigen identified by monoclonal antibody Ki 67  
cyclin B2  
cyclin A2  
shisa homolog 2 (Xenopus laevis)  
cell division cycle 20 homolog (S. cerevisiae)  
X-linked myotubular myopathy gene 1  
brain expressed gene 1  
brain expressed gene 4  
cell division cycle associated 5  
cell division cycle associated 3  
cyclin-dependent kinase 1  
DBF4 homolog (S. cerevisiae)  
CDC28 protein kinase regulatory subunit 2  
cyclin E2  
ribosomal protein L3-like  
myeloid leukemia factor 1  
cell division cycle 25 homolog A (S. pombe)  
thymidine kinase 1  
S-phase kinase-associated protein 2 (p45)  
minichromosome maintenance deficient 2 mitotin (S. cerevisiae)  
serum deprivation response

|        |      |      |       |
|--------|------|------|-------|
| Ska1   | 31   | 371  | 12.0  |
| Bub1   | 74   | 769  | 10.4  |
| Cenpf  | 40   | 418  | 10.3  |
| Melk   | 56   | 577  | 10.3  |
| Kif11  | 79   | 630  | 8.0   |
| Kif2c  | 76   | 569  | 7.5   |
| Ect2   | 98   | 727  | 7.4   |
| Ccnb1  | 145  | 1013 | 7.0   |
| Aspm   | 61   | 419  | 6.9   |
| Ncapg  | 78   | 526  | 6.8   |
| Bub1b  | 85   | 561  | 6.6   |
| Sgol1  | 52   | 338  | 6.5   |
| Kif20a | 61   | 379  | 6.2   |
| Cenpe  | 49   | 302  | 6.2   |
| Aurkb  | 78   | 465  | 5.9   |
| Psrc1  | 62   | 363  | 5.9   |
| Prc1   | 120  | 688  | 5.7   |
| Plk1   | 76   | 424  | 5.6   |
| Cep55  | 187  | 971  | 5.2   |
| Kifc1  | 63   | 319  | 5.1   |
| Spc25  | 215  | 1066 | 5.0   |
| Kif22  | 552  | 2664 | 4.8   |
| Zwilch | 85   | 401  | 4.7   |
| Calml3 | 250  | 1149 | 4.6   |
| Kif23  | 115  | 521  | 4.5   |
| Ncaph  | 292  | 1301 | 4.5   |
| Tacc3  | 114  | 490  | 4.3   |
| Aurka  | 94   | 390  | 4.1   |
| Cenpa  | 390  | 1566 | 4.0   |
| Cenpk  | 152  | 532  | 3.5   |
| Incenp | 384  | 1284 | 3.3   |
| Stmn1  | 2042 | 6681 | 3.3   |
| Cenpn  | 102  | 329  | 3.2   |
| Pttg1  | 852  | 2669 | 3.1   |
| Ccdc99 | 137  | 425  | 3.1   |
| Myi10  | 70   | 2069 | 29.7  |
| Hmmr   | 115  | 726  | 6.3   |
| Ttn    | 217  | 944  | 4.4   |
| Smpx   | 233  | 938  | 4.0   |
| Myom2  | 78   | 301  | 3.9   |
| Myo5c  | 117  | 389  | 3.3   |
| Myot   | 282  | 909  | 3.2   |
| Myh4   | 2018 | 6339 | 3.1   |
| Myh2   | 195  | 597  | 3.1   |
| Actn3  | 589  | 1787 | 3.0   |
| Trdn   | 212  | 642  | 3.0   |
| Mb     | 416  | 1258 | 3.0   |
| Ldb3   | 331  | 1001 | 3.0   |
| Rprm   | 9    | 896  | 103.8 |
| Plac1  | 31   | 2731 | 87.1  |
| Rspo1  | 222  | 3838 | 17.3  |
| Shcbp1 | 115  | 970  | 8.4   |
| Stx19  | 44   | 351  | 7.9   |
| Mki67  | 200  | 1469 | 7.3   |
| Ccnb2  | 205  | 1459 | 7.1   |
| Ccna2  | 309  | 2170 | 7.0   |
| Shisa2 | 220  | 1434 | 6.5   |
| Cdc20  | 437  | 2781 | 6.4   |
| Mtm1   | 297  | 1907 | 6.4   |
| Bex1   | 243  | 1554 | 6.4   |
| Bex4   | 62   | 351  | 5.7   |
| Cdca5  | 245  | 1384 | 5.6   |
| Cdca3  | 151  | 831  | 5.5   |
| Cdk1   | 522  | 2623 | 5.0   |
| Dbf4   | 254  | 1057 | 4.2   |
| Cks2   | 623  | 2628 | 4.2   |
| Ccne2  | 177  | 585  | 3.3   |
| Rpl3l  | 80   | 260  | 3.3   |
| Mlf1   | 188  | 595  | 3.2   |
| Cdc25a | 312  | 958  | 3.1   |
| Tk1    | 166  | 506  | 3.1   |
| Skp2   | 187  | 565  | 3.0   |
| Mcm2   | 217  | 652  | 3.0   |
| Sdpr   | 6603 | 2180 | 0.33  |

|                                                       |                |      |      |             |
|-------------------------------------------------------|----------------|------|------|-------------|
| <b>Protein Folding</b>                                |                |      |      |             |
| ankyrin repeat and SOCs box-containing 5              | Asb5           | 128  | 457  | <b>3.6</b>  |
| <b>Receptors</b>                                      |                |      |      |             |
| peroxisome proliferator activator receptor delta      | <b>Ppard</b>   | 0    | 2586 | <b>NA</b>   |
| nuclear receptor subfamily 4, group A, member 1       | <b>Nr4a1</b>   | 428  | 2506 | <b>5.9</b>  |
| glutamate receptor, ionotropic, delta 1               | <b>Grid1</b>   | 32   | 155  | <b>4.9</b>  |
| thyroid hormone receptor interactor 13                | Trip13         | 184  | 686  | <b>3.7</b>  |
| adrenergic receptor, beta 3                           | <b>Adrb3</b>   | 516  | 173  | <b>0.33</b> |
| <b>RNA Splicing</b>                                   |                |      |      |             |
| epithelial splicing regulatory protein 2              | Esrp2          | 172  | 612  | <b>3.6</b>  |
| <b>Transport</b>                                      |                |      |      |             |
| aquaporin 3                                           | <b>Aqp3</b>    | 87   | 2386 | <b>27.3</b> |
| ATPase, H+ transporting, lysosomal V1 subunit C2      | Atp6v1c2       | 164  | 2984 | <b>18.2</b> |
| synaptotagmin IX                                      | <b>Syt9</b>    | 42   | 565  | <b>13.6</b> |
| major urinary protein 1 (Slc25A19)                    | Mup1           | 1025 | 4316 | <b>4.2</b>  |
| G protein-coupled receptor 172B                       | <b>Gpr172b</b> | 382  | 1599 | <b>4.2</b>  |
| solute carrier family 34 (sodium phosphate), member 2 | Slc34a2        | 240  | 966  | <b>4.0</b>  |
| major urinary protein 5                               | Mup5           | 289  | 1118 | <b>3.9</b>  |
| <b>Transcription</b>                                  |                |      |      |             |
| E2F transcription factor 8                            | E2f8           | 62   | 468  | <b>7.6</b>  |
| helicase, lymphoid specific                           | Hells          | 266  | 1276 | <b>4.8</b>  |
| ets homologous factor                                 | <b>Ehf</b>     | 656  | 2576 | <b>3.9</b>  |
| transcription factor AP-2, alpha                      | <b>Tcfap2a</b> | 162  | 509  | <b>3.1</b>  |
| myelocytomatosis oncogene                             | <b>Myc</b>     | 923  | 2727 | <b>3.0</b>  |



**Supplementary Table 6. Gene expression preferentially altered in wild-type mice treated with GW501516 for 11 weeks.** Mice (WT) at 4 weeks of age were fed a diet containing 0.005% GW501516 for 11 weeks. Shown are  $\geq 3$ -fold changes in gene expression in mammary tissue with a score  $\geq 300$ . Scores for similarly treated MMTV-PPAR $\delta$  mice ( $\delta$ ) are shown for comparison. Symbols in **bold** denote genes containing PPAR response elements.

| Function                                                            | Symbol          | Score |       | Ratio       | Score |      | Ratio                  |
|---------------------------------------------------------------------|-----------------|-------|-------|-------------|-------|------|------------------------|
|                                                                     |                 | WT    | WT+GW | WT+GW/WT    | d     | d+GW | $\delta$ +GW/ $\delta$ |
| <b>Adhesion/Extracellular Matrix</b>                                |                 |       |       |             |       |      |                        |
| leupaxin                                                            | Lpxn            | 674   | 201   | <b>0.30</b> | 453   | 670  | 1.5                    |
| cartilage acidic protein 1                                          | <b>Crta1</b>    | 511   | 118   | <b>0.23</b> | 147   | 73   | 0.49                   |
| fibrinogen beta chain                                               | Fgb             | 497   | 69    | <b>0.14</b> | 58    | 60   | 1.0                    |
| <b>Differentiation/Development</b>                                  |                 |       |       |             |       |      |                        |
| loricrin                                                            | Lor             | 120   | 2215  | <b>18.4</b> | 118   | 117  | 1.0                    |
| parvalbumin                                                         | <b>Pvalb</b>    | 1648  | 13592 | <b>8.2</b>  | 4107  | 3129 | 0.76                   |
| casein alpha s2-like A                                              | Csn1s2a         | 255   | 2034  | <b>8.0</b>  | 1019  | 2625 | 2.6                    |
| SET and MYND domain containing 1                                    | Smyd1           | 76    | 597   | <b>7.8</b>  | 79    | 68   | 0.86                   |
| SPEG complex locus                                                  | <b>Speg</b>     | 91    | 594   | <b>6.5</b>  | 142   | 92   | 0.64                   |
| late cornified envelope 1A1                                         | Lce1a1          | 194   | 977   | <b>5.0</b>  | 142   | 167  | 1.2                    |
| <b>DNA Repair</b>                                                   |                 |       |       |             |       |      |                        |
| ADP-ribosyltransferase 1                                            | <b>Art1</b>     | 90    | 2142  | <b>23.8</b> | 308   | 214  | 0.70                   |
| DNA-damage-inducible transcript 4-like                              | Ddit4l          | 137   | 2224  | <b>16.2</b> | 495   | 327  | 0.66                   |
| <b>Inflammation/Immune Response</b>                                 |                 |       |       |             |       |      |                        |
| tumor necrosis factor receptor superfamily, member 19               | <b>Tnfrsf19</b> | 43    | 342   | <b>8.0</b>  | 400   | 70   | 0.17                   |
| leucine rich repeat containing 20                                   | Lrrc20          | 140   | 570   | <b>4.1</b>  | 184   | 176  | 1.0                    |
| polymeric immunoglobulin receptor                                   | Ptgr            | 195   | 796   | <b>4.1</b>  | 586   | 1416 | 2.4                    |
| monocyte to macrophage differentiation-associated 2                 | Mmd2            | 133   | 525   | <b>3.9</b>  | 115   | 158  | 1.4                    |
| chemokine (C-X-C motif) ligand 15                                   | Cxcl15          | 524   | 1635  | <b>3.1</b>  | 648   | 1313 | 2.0                    |
| interleukin 27 receptor, alpha                                      | <b>Il27ra</b>   | 538   | 173   | <b>0.3</b>  | 332   | 439  | 1.3                    |
| CD28 antigen                                                        | <b>Cd28</b>     | 323   | 80    | <b>0.25</b> | 223   | 284  | 1.3                    |
| CD52 antigen                                                        | <b>Cd52</b>     | 4775  | 1131  | <b>0.24</b> | 3934  | 4099 | 1.0                    |
| chemokine (C-C motif) ligand 5                                      | Ccl5            | 3089  | 707   | <b>0.23</b> | 2552  | 2857 | 1.1                    |
| interleukin 2 receptor, gamma chain                                 | <b>Il2rg</b>    | 484   | 109   | <b>0.22</b> | 306   | 437  | 1.4                    |
| immunoglobulin heavy chain 6 (heavy chain of IgM)                   | Igh-6           | 3888  | 813   | <b>0.21</b> | 1022  | 2754 | 2.7                    |
| CD3 antigen, gamma polypeptide                                      | Cd3g            | 907   | 161   | <b>0.18</b> | 742   | 762  | 1.0                    |
| immunoglobulin kappa chain variable 28 (V28)                        | Igk-V28         | 527   | 91    | <b>0.17</b> | 81    | 165  | 2.0                    |
| T-cell receptor beta-2 joining region                               | tcrb-j          | 2048  | 334   | <b>0.16</b> | 1424  | 1671 | 1.2                    |
| CD3 antigen, epsilon polypeptide                                    | Cd3e            | 364   | 55    | <b>0.15</b> | 256   | 325  | 1.3                    |
| lymphocyte protein tyrosine kinase                                  | <b>Lck</b>      | 1206  | 179   | <b>0.15</b> | 886   | 1041 | 1.2                    |
| lymphotoxin B                                                       | <b>Ltb</b>      | 2802  | 390   | <b>0.14</b> | 2176  | 2381 | 1.1                    |
| immunoglobulin heavy constant gamma 1 (G1m marker)                  | Ighg1           | 3663  | 508   | <b>0.14</b> | 484   | 1167 | 2.4                    |
| chemokine (C-C motif) receptor 6                                    | Ccr6            | 463   | 52    | <b>0.11</b> | 324   | 350  | 1.1                    |
| interleukin 7 receptor                                              | Il7r            | 879   | 93    | <b>0.11</b> | 561   | 1058 | 1.9                    |
| interleukin 4 induced 1                                             | <b>Il4i1</b>    | 383   | 38    | <b>0.10</b> | 245   | 280  | 1.1                    |
| linker for activation of T cells                                    | <b>Lat</b>      | 510   | 49    | <b>0.10</b> | 369   | 400  | 1.1                    |
| chemokine (C-C motif) ligand 21A                                    | Ccl21a          | 3750  | 308   | <b>0.08</b> | 1775  | 3017 | 1.7                    |
| CD3 antigen, delta polypeptide                                      | Cd3d            | 1261  | 100   | <b>0.08</b> | 901   | 865  | 1.0                    |
| CD5 antigen                                                         | Cd5             | 320   | 22    | <b>0.07</b> | 192   | 226  | 1.2                    |
| CD79B antigen                                                       | <b>Cd79b</b>    | 1388  | 81    | <b>0.06</b> | 739   | 679  | 0.92                   |
| chemokine (C-C motif) receptor 7                                    | <b>Ccr7</b>     | 456   | 20    | <b>0.04</b> | 256   | 310  | 1.2                    |
| complement receptor 2                                               | <b>Cr2</b>      | 391   | 13    | <b>0.03</b> | 180   | 215  | 1.2                    |
| CD8 antigen, beta chain 1                                           | Cd8b1           | 340   | 10    | <b>0.03</b> | 194   | 244  | 1.3                    |
| chemokine (C-C motif) ligand 19                                     | Ccl19           | 1995  | 54    | <b>0.03</b> | 1213  | 1422 | 1.2                    |
| immunoglobulin heavy variable V14-2                                 | Ighv14-2        | 1331  | 32    | <b>0.02</b> | 618   | 451  | 0.73                   |
| <b>Invasion</b>                                                     |                 |       |       |             |       |      |                        |
| leucine rich repeat containing 2                                    | Lrrc2           | 11    | 540   | <b>47.4</b> | 58    | 41   | 0.71                   |
| cystatin E/M                                                        | <b>Cst6</b>     | 53    | 633   | <b>12.1</b> | 120   | 3899 | 32.5                   |
| tissue inhibitor of metalloproteinase 4                             | <b>Timp4</b>    | 4348  | 1341  | <b>0.31</b> | 1253  | 834  | 0.67                   |
| <b>Ion Channel</b>                                                  |                 |       |       |             |       |      |                        |
| calcium channel, voltage-dependent, gamma subunit 1                 | <b>Cacng1</b>   | 13    | 362   | <b>27.5</b> | 75    | 54   | 0.72                   |
| potassium voltage-gated channel, shaker-related subfamily, member 7 | Kcna7           | 1484  | 6226  | <b>4.2</b>  | 1724  | 1434 | 0.83                   |
| <b>Metabolism</b>                                                   |                 |       |       |             |       |      |                        |
| calcitonin/calcitonin-related polypeptide, alpha                    | Calca           | 35    | 1315  | <b>38.1</b> | 5293  | 18   | 0.00                   |
| creatine kinase, mitochondrial 2                                    | <b>Ckmt2</b>    | 197   | 5344  | <b>27.2</b> | 836   | 397  | 0.48                   |
| protein phosphatase 1, regulatory (inhibitor) subunit 3A            | <b>Ppp1r3a</b>  | 30    | 627   | <b>21.0</b> | 114   | 66   | 0.57                   |
| apolipoprotein B mRNA editing enzyme, catalytic polypeptide 2       | <b>Apobec2</b>  | 398   | 6907  | <b>17.3</b> | 1221  | 793  | 0.65                   |
| cytochrome c oxidase, subunit VI a, polypeptide 2                   | <b>Cox6a2</b>   | 396   | 6569  | <b>16.6</b> | 1136  | 841  | 0.74                   |
| aspartate-beta-hydroxylase                                          | <b>Asph</b>     | 92    | 1447  | <b>15.7</b> | 224   | 178  | 0.79                   |
| phosphoglycerate mutase 2                                           | <b>Pgam2</b>    | 592   | 8511  | <b>14.4</b> | 1912  | 1426 | 0.75                   |
| phosphorylase kinase, gamma-subunit 1                               | <b>Phkg1</b>    | 64    | 465   | <b>7.3</b>  | 70    | 67   | 1.0                    |
| phosphofructokinase, muscle                                         | <b>Pfkm</b>     | 654   | 3302  | <b>5.0</b>  | 801   | 567  | 0.71                   |
| acyl-CoA thioesterase 1                                             | <b>Acot1</b>    | 1321  | 5814  | <b>4.4</b>  | 7933  | 5664 | 0.71                   |
| pyridoxal-dependent decarboxylase domain containing 1               | Pdxdc1          | 80    | 300   | <b>3.7</b>  | 185   | 423  | 2.3                    |
| cytochrome P450, family 1, subfamily b, polypeptide 1               | <b>Cyp1b1</b>   | 347   | 1285  | <b>3.7</b>  | 1547  | 1021 | 0.66                   |
| <b>Motility</b>                                                     |                 |       |       |             |       |      |                        |
| myogenic factor 6                                                   | Myf6            | 21    | 944   | <b>45.2</b> | 118   | 87   | 0.74                   |
| myosin, light polypeptide 2, regulatory, cardiac, slow              | MyI2            | 20    | 796   | <b>40.4</b> | 15    | 22   | 1.4                    |
| myomesin 2                                                          | Myom2           | 78    | 2452  | <b>31.5</b> | 301   | 176  | 0.58                   |
| myozenin 2                                                          | Myoz2           | 25    | 748   | <b>29.7</b> | 94    | 39   | 0.42                   |
| muscle-related coiled-coil protein                                  | Murc            | 19    | 480   | <b>25.9</b> | 66    | 35   | 0.53                   |
| myotilin                                                            | <b>Myot</b>     | 282   | 7162  | <b>25.4</b> | 909   | 736  | 0.81                   |
| sarcoglycan, gamma (dystrophin-associated glycoprotein)             | Sgcyg           | 37    | 1002  | <b>26.8</b> | 124   | 80   | 0.64                   |
| titin                                                               | <b>Ttn</b>      | 217   | 5659  | <b>26.1</b> | 944   | 467  | 0.49                   |
| smoothelin-like 1                                                   | Smtnl1          | 43    | 1106  | <b>26.0</b> | 105   | 67   | 0.63                   |

|                                                            |                |      |       |             |       |       |      |
|------------------------------------------------------------|----------------|------|-------|-------------|-------|-------|------|
| myosin, heavy polypeptide 8, skeletal muscle, perinatal    | <b>Myh8</b>    | 36   | 882   | <b>24.7</b> | 135   | 90    | 0.67 |
| myosin, heavy polypeptide 2, skeletal muscle, adult        | <b>Myh2</b>    | 195  | 4517  | <b>23.2</b> | 597   | 187   | 0.31 |
| small muscle protein, X-linked                             | <b>Smpx</b>    | 233  | 5309  | <b>22.8</b> | 938   | 531   | 0.57 |
| LIM domain binding 3                                       | <b>Ldb3</b>    | 224  | 4982  | <b>22.3</b> | 590   | 425   | 0.72 |
| popeye domain containing 3                                 | <b>Popdc3</b>  | 18   | 403   | <b>22.3</b> | 87    | 64    | 0.74 |
| troponin I, skeletal, fast 2                               | <b>Tnni2</b>   | 41   | 890   | <b>21.9</b> | 121   | 86    | 0.71 |
| cysteine and glycine-rich protein 3                        | <b>Csrp3</b>   | 87   | 1724  | <b>19.9</b> | 217   | 151   | 0.70 |
| triadin                                                    | <b>Trdn</b>    | 153  | 3035  | <b>19.8</b> | 499   | 365   | 0.73 |
| caveolin 3                                                 | <b>Cav3</b>    | 22   | 430   | <b>19.4</b> | 62    | 58    | 0.93 |
| myosin, light polypeptide 3                                | <b>MyI3</b>    | 25   | 483   | <b>19.2</b> | 59    | 53    | 0.90 |
| myomesin 1                                                 | <b>Myom1</b>   | 170  | 3204  | <b>18.9</b> | 469   | 346   | 0.74 |
| sarcolipin                                                 | <b>Slp</b>     | 36   | 644   | <b>18.0</b> | 146   | 42    | 0.29 |
| actinin alpha 2                                            | <b>Actn2</b>   | 101  | 2056  | <b>20.3</b> | 257   | 147   | 0.57 |
| synaptophysin-like 2                                       | <b>Sypl2</b>   | 35   | 711   | <b>20.2</b> | 92    | 81    | 0.89 |
| troponin C, cardiac/slow skeletal                          | <b>Tnnc1</b>   | 23   | 373   | <b>16.5</b> | 36    | 76    | 2.1  |
| SH3-binding domain glutamic acid-rich protein              | <b>Sh3bgr</b>  | 168  | 2706  | <b>16.1</b> | 457   | 294   | 0.64 |
| titin-cap                                                  | <b>Tcap</b>    | 425  | 6819  | <b>16.0</b> | 1251  | 712   | 0.57 |
| myoglobin                                                  | <b>Mb</b>      | 416  | 6489  | <b>15.6</b> | 1258  | 732   | 0.58 |
| myosin, heavy polypeptide 6, cardiac muscle, alpha         | <b>Myh6</b>    | 51   | 801   | <b>15.6</b> | 120   | 103   | 0.86 |
| tropomodulin 4                                             | <b>Tmod4</b>   | 220  | 3402  | <b>15.4</b> | 576   | 535   | 0.93 |
| myozenin 1                                                 | <b>Myoz1</b>   | 550  | 8477  | <b>15.4</b> | 1472  | 1342  | 0.91 |
| cardiomyopathy associated 5                                | <b>Cmya5</b>   | 311  | 4760  | <b>15.3</b> | 832   | 616   | 0.74 |
| taxilin beta                                               | <b>Txlnb</b>   | 183  | 2753  | <b>15.1</b> | 222   | 209   | 0.94 |
| myosin, heavy polypeptide 1, skeletal muscle, adult        | <b>Myh1</b>    | 822  | 12194 | <b>14.8</b> | 1734  | 1816  | 1.0  |
| actinin alpha 3                                            | <b>Actn3</b>   | 589  | 8734  | <b>14.8</b> | 1787  | 1624  | 0.91 |
| ATPase, Ca++ transporting, cardiac muscle, fast twitch 1   | <b>Atp2a1</b>  | 861  | 11786 | <b>13.7</b> | 1969  | 1718  | 0.87 |
| myosin binding protein H                                   | <b>Mybph</b>   | 111  | 1500  | <b>13.5</b> | 158   | 133   | 0.84 |
| PDZ and LIM domain 5                                       | <b>Pdlim5</b>  | 384  | 5112  | <b>13.3</b> | 819   | 640   | 0.78 |
| calsequestrin 1                                            | <b>Casq1</b>   | 374  | 4979  | <b>13.3</b> | 919   | 648   | 0.71 |
| troponin T3, skeletal, fast                                | <b>Tnnt3</b>   | 1554 | 16137 | <b>10.4</b> | 4393  | 3925  | 0.89 |
| myosin, light polypeptide kinase 2, skeletal muscle        | <b>Mylk2</b>   | 87   | 893   | <b>10.2</b> | 119   | 92    | 0.77 |
| myosin, heavy polypeptide 4, skeletal muscle               | <b>Myh4</b>    | 2018 | 19402 | <b>9.6</b>  | 6339  | 5177  | 0.82 |
| troponin I, skeletal, fast 2                               | <b>Tnni2</b>   | 2197 | 18307 | <b>8.3</b>  | 6095  | 4698  | 0.77 |
| troponin T1, skeletal, slow                                | <b>Tnnt1</b>   | 49   | 395   | <b>8.0</b>  | 55    | 34    | 0.63 |
| actin, alpha, cardiac muscle 1                             | <b>Actc1</b>   | 463  | 2291  | <b>5.0</b>  | 707   | 643   | 0.91 |
| creatine kinase, muscle                                    | <b>Ckm</b>     | 2080 | 14207 | <b>6.8</b>  | 5540  | 5226  | 0.94 |
| myosin, light polypeptide 1                                | <b>MyI1</b>    | 3185 | 15349 | <b>4.8</b>  | 7526  | 6061  | 0.81 |
| myosin light chain, phosphorylatable, fast skeletal muscle | <b>MyIpf</b>   | 2783 | 17675 | <b>6.4</b>  | 7623  | 6172  | 0.81 |
| actin, alpha 1, skeletal muscle                            | <b>Acta1</b>   | 5136 | 18951 | <b>3.7</b>  | 10566 | 10658 | 1.0  |
| troponin C2, fast                                          | <b>Tnnc2</b>   | 4306 | 14733 | <b>3.4</b>  | 9804  | 8161  | 0.83 |
| X-linked myotubular myopathy gene 1                        | <b>Mtm1</b>    | 297  | 1411  | <b>4.8</b>  | 1907  | 686   | 0.36 |
| PDZ and LIM domain 3                                       | <b>Pdlim3</b>  | 1027 | 3723  | <b>3.6</b>  | 1491  | 719   | 0.48 |
| SAM domain, SH3 domain and nuclear localization signals, 1 | <b>Samsn1</b>  | 341  | 72    | <b>0.21</b> | 192   | 314   | 1.6  |
| <b>Proliferation</b>                                       |                |      |       |             |       |       |      |
| ribosomal protein L3-like                                  | <b>Rpl3l</b>   | 80   | 2016  | <b>25.4</b> | 260   | 194   | 0.75 |
| myeloid leukemia factor 1                                  | <b>Mlf1</b>    | 188  | 3446  | <b>18.3</b> | 595   | 473   | 0.80 |
| R-spondin homolog (Xenopus laevis)                         | <b>Rspo1</b>   | 222  | 2610  | <b>11.7</b> | 3838  | 226   | 0.06 |
| syntaxin 19                                                | <b>Stx19</b>   | 44   | 334   | <b>7.5</b>  | 351   | 304   | 0.87 |
| shisa homolog 2 (Xenopus laevis)                           | <b>Shisa2</b>  | 220  | 1552  | <b>7.0</b>  | 1434  | 554   | 0.39 |
| brain expressed gene 1                                     | <b>Bex1</b>    | 243  | 1260  | <b>5.2</b>  | 1554  | 351   | 0.23 |
| phosphodiesterase 4D interacting protein (myomegalin)      | <b>Pde4dip</b> | 778  | 4056  | <b>5.2</b>  | 963   | 795   | 0.83 |
| profilin 2                                                 | <b>Pfn2</b>    | 717  | 2661  | <b>3.7</b>  | 1315  | 779   | 0.59 |
| sel-1 suppressor of lin-12-like 3 (C. elegans)             | <b>Sel1l3</b>  | 107  | 396   | <b>3.7</b>  | 131   | 142   | 1.1  |
| transforming growth factor, beta 2                         | <b>Tgfb2</b>   | 176  | 547   | <b>3.1</b>  | 417   | 356   | 0.85 |
| <b>Protein Folding</b>                                     |                |      |       |             |       |       |      |
| ankyrin repeat and SOCS box-containing 11                  | <b>Asb11</b>   | 55   | 1169  | <b>21.2</b> | 156   | 106   | 0.68 |
| ankyrin repeat and SOCS box-containing 5                   | <b>Asb5</b>    | 128  | 2557  | <b>19.9</b> | 457   | 278   | 0.61 |
| ankyrin repeat and SOCS box-containing 12                  | <b>Asb12</b>   | 17   | 325   | <b>19.1</b> | 47    | 35    | 0.75 |
| <b>Transport</b>                                           |                |      |       |             |       |       |      |
| aquaporin 4                                                | <b>Aqp4</b>    | 42   | 910   | <b>21.9</b> | 92    | 73    | 0.80 |
| ATPase, H+ transporting, lysosomal V1 subunit C2           | <b>At6v1c2</b> | 164  | 1228  | <b>7.5</b>  | 2984  | 2392  | 0.80 |
| ATP-binding cassette, sub-family B (MDR/TAP), member 4     | <b>Abcb4</b>   | 84   | 497   | <b>5.9</b>  | 116   | 94    | 0.81 |
| <b>Transcription</b>                                       |                |      |       |             |       |       |      |
| paired-like homeodomain transcription factor 2             | <b>Pitx2</b>   | 12   | 332   | <b>27.4</b> | 32    | 21    | 0.66 |
| ISL1 transcription factor, LIM/homeodomain                 | <b>Isl1</b>    | 15   | 346   | <b>23.7</b> | 40    | 21    | 0.53 |
| ets homologous factor                                      | <b>Ehf</b>     | 656  | 2216  | <b>3.4</b>  | 2576  | 1686  | 0.65 |
| putative homeodomain transcription factor 2                | <b>Phtf2</b>   | 481  | 1467  | <b>3.0</b>  | 504   | 511   | 1.0  |
| LIM homeobox protein 8                                     | <b>Lhx8</b>    | 136  | 409   | <b>3.0</b>  | 165   | 161   | 1.0  |
| Spi-B transcription factor (Spi-1/PU.1 related)            | <b>Spib</b>    | 934  | 27    | <b>0.03</b> | 525   | 780   | 1.5  |
| <b>Unknown</b>                                             |                |      |       |             |       |       |      |
| submaxillary gland androgen regulated protein 2            | <b>Smr2</b>    | 133  | 2011  | <b>15.1</b> | 314   | 282   | 0.90 |
